# Supplementary material
Source: publisher figshare collection journal article supplement (https://gsajournals.figshare.com/ndownloader/files/13806446)
Supplement: Supplementary file 1 [file 13806446]

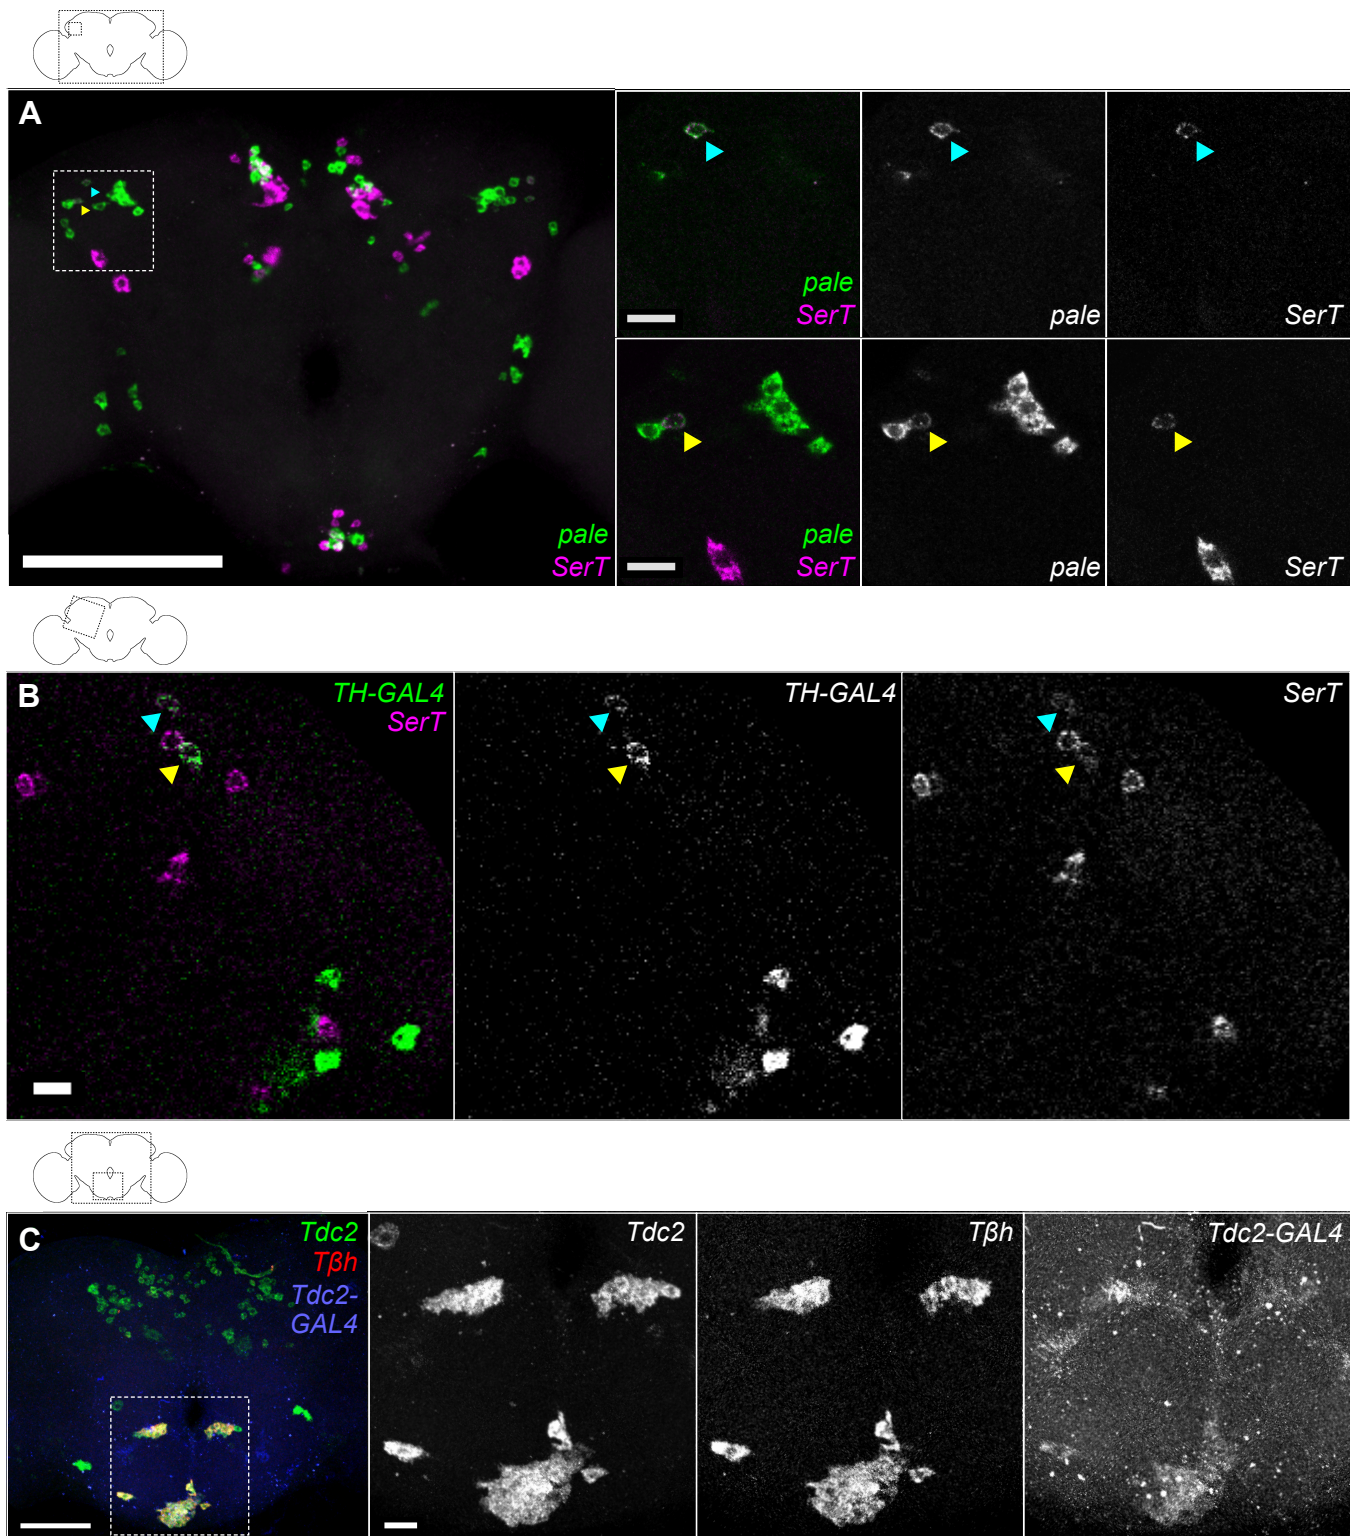

**Figure S3.** Colocalization of probes for different neurotransmitters.

(A) Distribution of *pale* (Cy3; green) and *SerT* (Cy5; magenta) mRNAs in part of a wild-type brain. A partial z-projection of the posterior brain is shown on the left. The boxed region was imaged at higher magnification, from which two single confocal slices are shown on the right, merged and with individual channels in gray. Arrowheads indicate the location of cells co-expressing both mRNAs. Scale bars, 100  $\mu$ m (left) and 10  $\mu$ m (right). (B) A *TH-GAL4*, *UAS-HaloTag* brain was labeled with FISH probes for *HaloTag* (Cy5; green) and *SerT* (Cy3; magenta) mRNAs (Long *et al.* 2017). A single confocal slice from the posterior left dorsal brain is shown, with individual channels in gray to the right. Arrowheads indicate the location of cells labeled with both probes. Scale bar, 50  $\mu$ m. (C) A *Tdc2-GAL4*, *UAS-HaloTag* brain was labeled with ATTO 647N HaloTag ligand (blue) and FISH probes for *Tdc2* (Cy3; green) and *Tβh* (AF594; red) mRNAs. Each channel is shown in gray on the right. Scale bar, 100  $\mu$ m.
